# Supplementary material for: Altered glucose profiles and risk for hypoglycaemia during oral glucose tolerance testing in pregnancies after gastric bypass surgery
Source: Springer Nature journal article supplement (doi:10.1007/s00125-016-4128-8), 2016-10-18

**ESM Figure 1:** Newborn infant characteristics: A: birth weight percentiles (lines indicating 10<sup>th</sup> and 90<sup>th</sup> percentile); B: estimated mean difference and 95% family wise confidence levels of birth weight percentiles

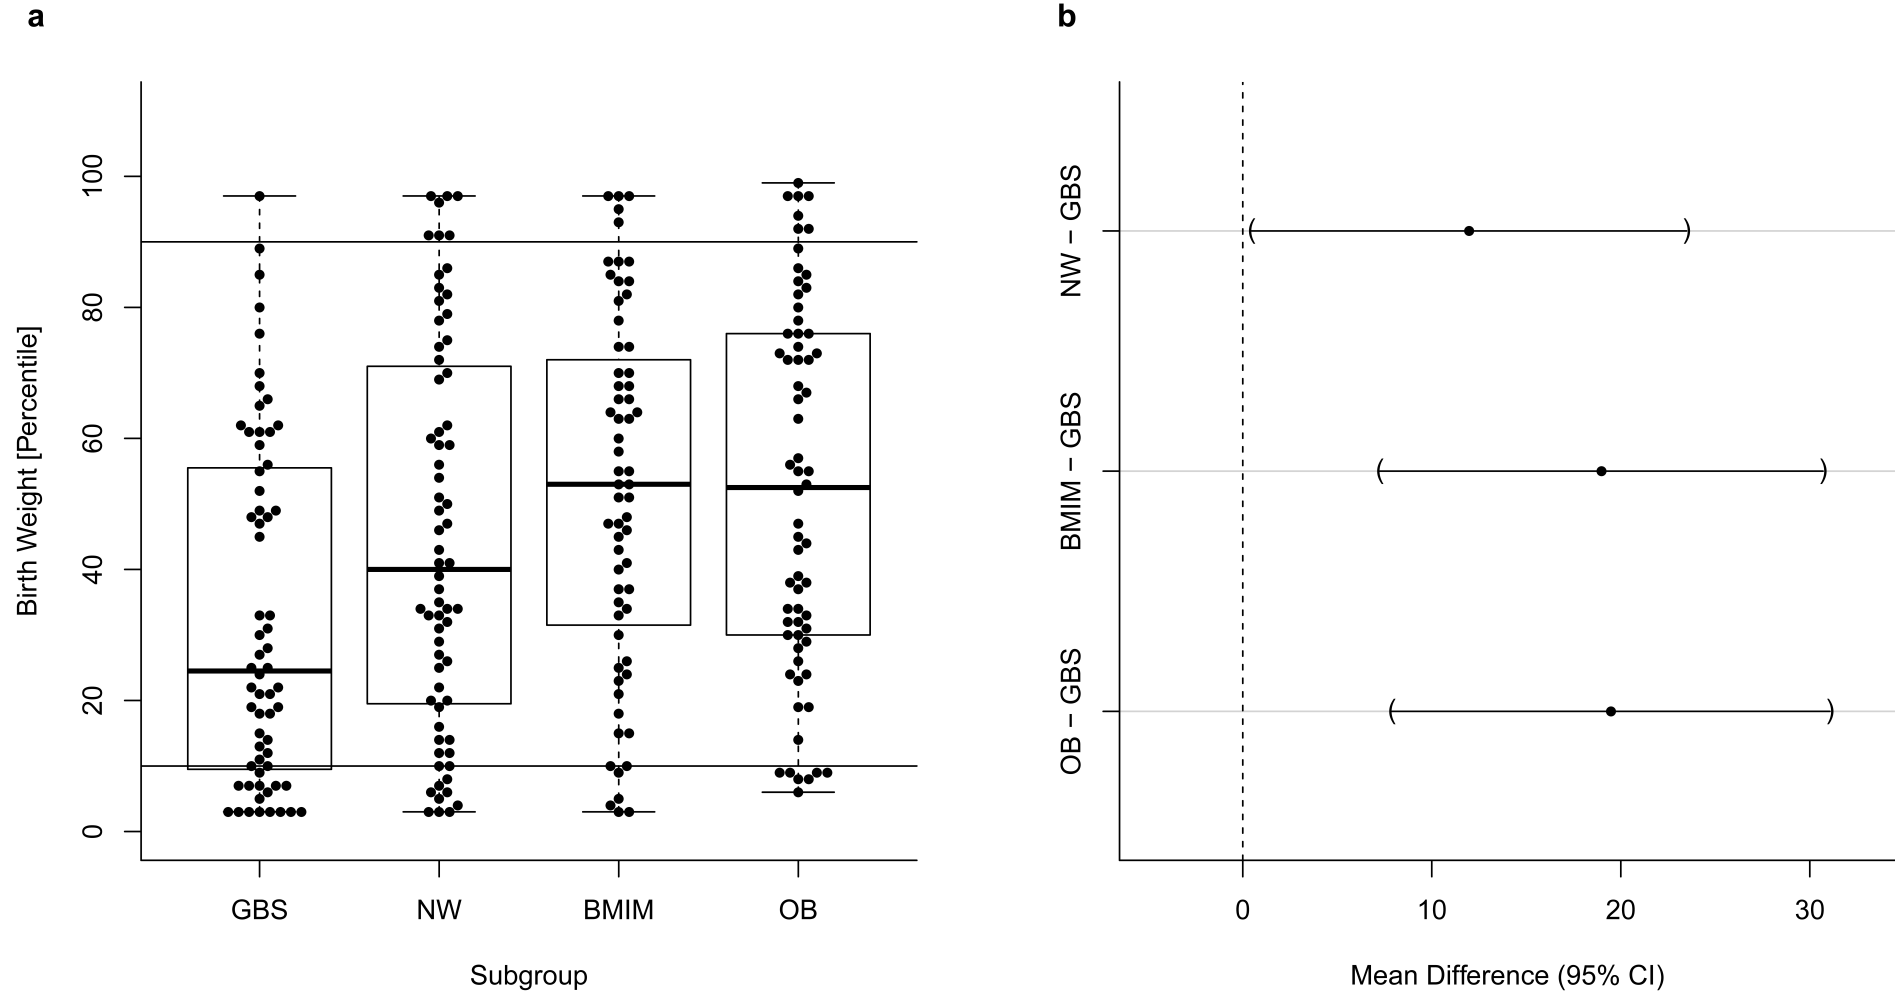

Supplement: MOESM1 [file 10898464]
